# Supplementary material for: Host-Guest Complexations of Amine Boranes and Isoelectronic/Isostructural Quaternary Alkylammonium Cations by Cucurbit[7]uril in Aqueous Solution
Source: Hindawi journal article supplement (doi:10.1155/2019/8124696), 2019-04-14
Supplement: f1 [file 8124696.f1.pdf]

## Supplemental Material

## The host-guest complexations of amine boranes and isoelectronic/isostructural quaternary alkylammonium cations by cucurbit[7]uril in aqueous solution

Mona A. Gamal-Eldin and Donal H. Macartney

Department of Chemistry, Queen's University, Kingston, ON K7L 3N6, Canada  
donal@chem.queensu.ca

| Table of Contents                                                                                                                                                                                                                                                                                            | Page |
|--------------------------------------------------------------------------------------------------------------------------------------------------------------------------------------------------------------------------------------------------------------------------------------------------------------|------|
| <b>Figure S1.</b> $^1\text{H}$ NMR spectra of ammonia borane (1.0 mM) in the (a) absence and (b) presence of CB[7] (2.5 mM) in $\text{D}_2\text{O}$ (pD = 4.75).                                                                                                                                             | 1    |
| <b>Figure S2.</b> $^1\text{H}$ NMR spectra for $(\text{CH}_3)_2\text{HNBH}_3$ ( $1.00 \times 10^{-3}$ M) in the presence of (a) 0.00, (b) 0.17, (c) 0.49, (d) 0.60, (e) 0.88, (f) 1.00, (g) 1.48, (h) 1.60, (i) 2.34, (j) 3.26, and (k) 4.00 equivalents of CB[7] in $\text{D}_2\text{O}$ . (pD = 4.7)       | 2    |
| <b>Figure S3.</b> $^1\text{H}$ NMR spectra of $(\text{CH}_2\text{CH}_3)_3\text{NBH}_3$ ( $1.0 \times 10^{-3}$ M) in the presence of (a) 0.00, (b) 0.16, (c) 0.30, (d) 0.44, (e) 0.62, (f) 0.81, (g) 1.17, and (h) 2.24 equivalents of CB[7] in $\text{D}_2\text{O}$ (pD = 4.7).                              | 2    |
| <b>Figure S4.</b> Plot of the chemical shift for the methyl proton resonance of $(\text{CH}_2\text{CH}_3)_3\text{NBH}_3$ ( $1.00 \times 10^{-3}$ M) as a function of [CB[7]] in $\text{D}_2\text{O}$ .                                                                                                       | 3    |
| <b>Figure S5.</b> $^1\text{H}$ NMR spectra for $\text{C}(\text{CH}_3)_3\text{H}_2\text{NBH}_3$ ( $1.00 \times 10^{-3}$ M) in the presence of (a) 0.00, (b) 0.18, (c) 0.32, (d) 0.51, (e) 0.68, (f) 0.86, (g) 1.17, (h) 1.57, (i) 2.51, (j) 3.23, and (k) 4.10 equivalents of CB[7] in $\text{D}_2\text{O}$ . | 3    |
| <b>Figure S6.</b> $^1\text{H}$ NMR spectra for N-methylmorpholine borane ( $1.00 \times 10^{-3}$ M) in the presence of (a) 0.00, (b) 0.20, (c) 0.41, (d) 0.62, (e) 0.83, and (f) 1.55 equivalents of CB[7] in $\text{D}_2\text{O}$ .                                                                         | 4    |
| <b>Figure S7.</b> $^{11}\text{B}$ NMR spectra for morpholine borane ( $1.00 \times 10^{-3}$ M) in the presence of (a) 0.00, and (b) 1.4 equivalents of CB[7] in $\text{D}_2\text{O}$ .                                                                                                                       | 4    |

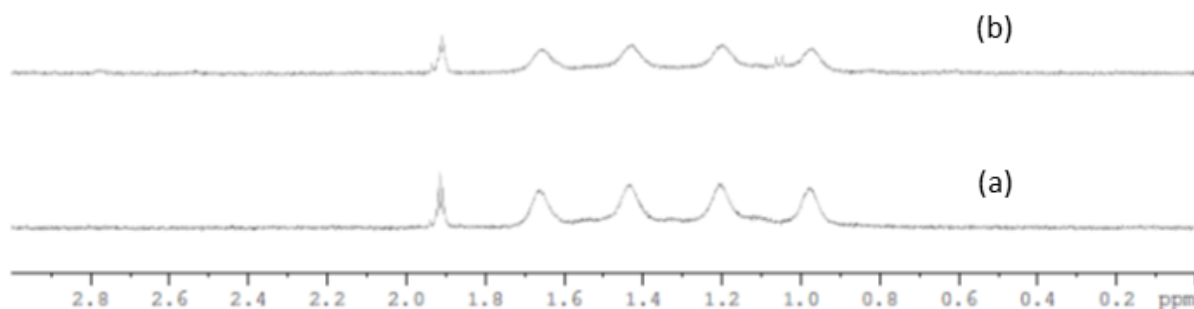

**Figure S1.**  $^1\text{H}$  NMR spectra of ammonia borane (1.0 mM) in the (a) absence and (b) presence of CB[7] (2.5 mM) in  $\text{D}_2\text{O}$  (pD = 4.75). Peak at 1.92 ppm is due to the residual protons from the acetate buffer.

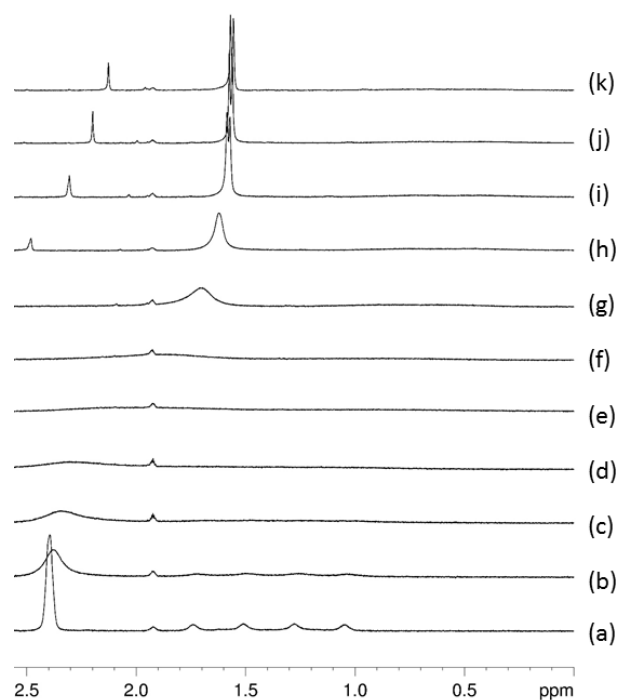

**Figure S2.**  $^1\text{H}$  NMR spectra for  $(\text{CH}_3)_2\text{HNBH}_3$  ( $1.00 \times 10^{-3}$  M) in the presence of (a) 0.00, (b) 0.17, (c) 0.49, (d) 0.60, (e) 0.88, (f) 1.00, (g) 1.48, (h) 1.60, (i) 2.34, (j) 3.26, and (k) 4.00 equivalents of CB[7] in  $\text{D}_2\text{O}$ . (pD = 4.7)

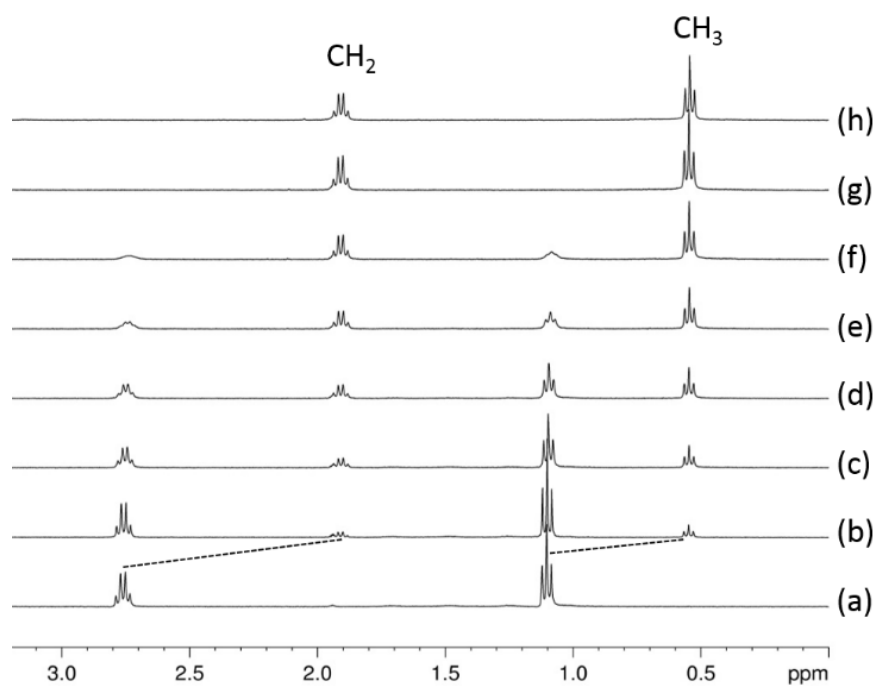

**Figure S3.**  $^1\text{H}$  NMR spectra of  $(\text{CH}_2\text{CH}_3)_3\text{NBH}_3$  ( $1.0 \times 10^{-3}$  M) in the presence of (a) 0.00, (b) 0.16, (c) 0.30, (d) 0.44, (e) 0.62, (f) 0.81, (g) 1.17, and (h) 2.24 equivalents of CB[7] in  $\text{D}_2\text{O}$  (pD = 4.7).

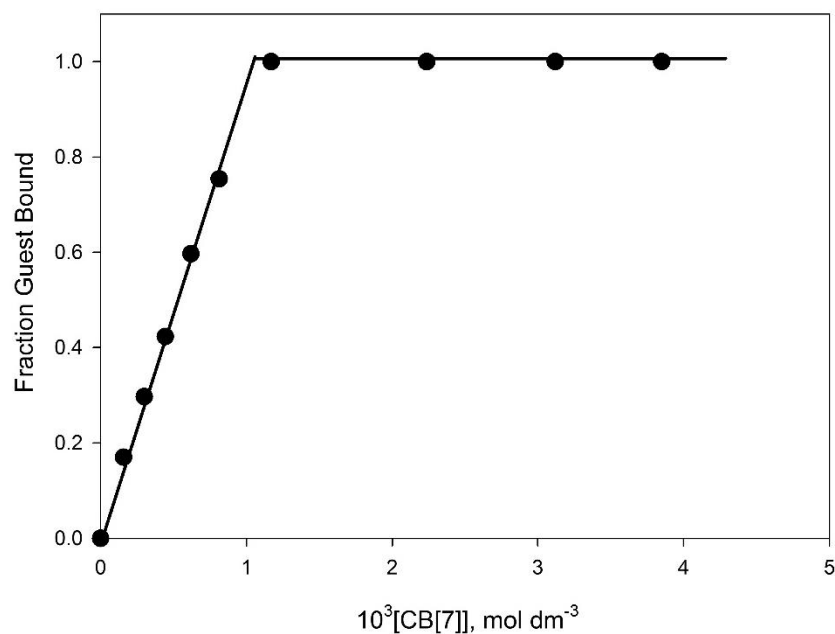

**Figure S4.** Plot of the chemical shift for the methyl proton resonance of  $(\text{CH}_2\text{CH}_3)_3\text{NBH}_3$  ( $1.00 \times 10^{-3}$  M) as a function of  $[\text{CB}[7]]$  in  $\text{D}_2\text{O}$ .

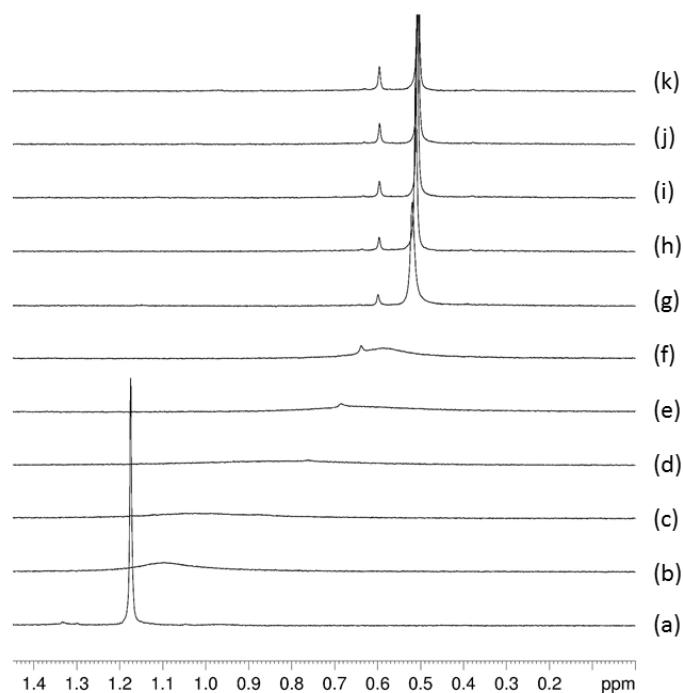

**Figure S5.**  $^1\text{H}$  NMR spectra for  $\text{C}(\text{CH}_3)_3\text{H}_2\text{NBH}_3$  ( $1.00 \times 10^{-3}$  M) in the presence of (a) 0.00, (b) 0.18, (c) 0.32, (d) 0.51, (e) 0.68, (f) 0.86, (g) 1.17, (h) 1.57, (i) 2.51, (j) 3.23, and (k) 4.10 equivalents of  $\text{CB}[7]$  in  $\text{D}_2\text{O}$ .

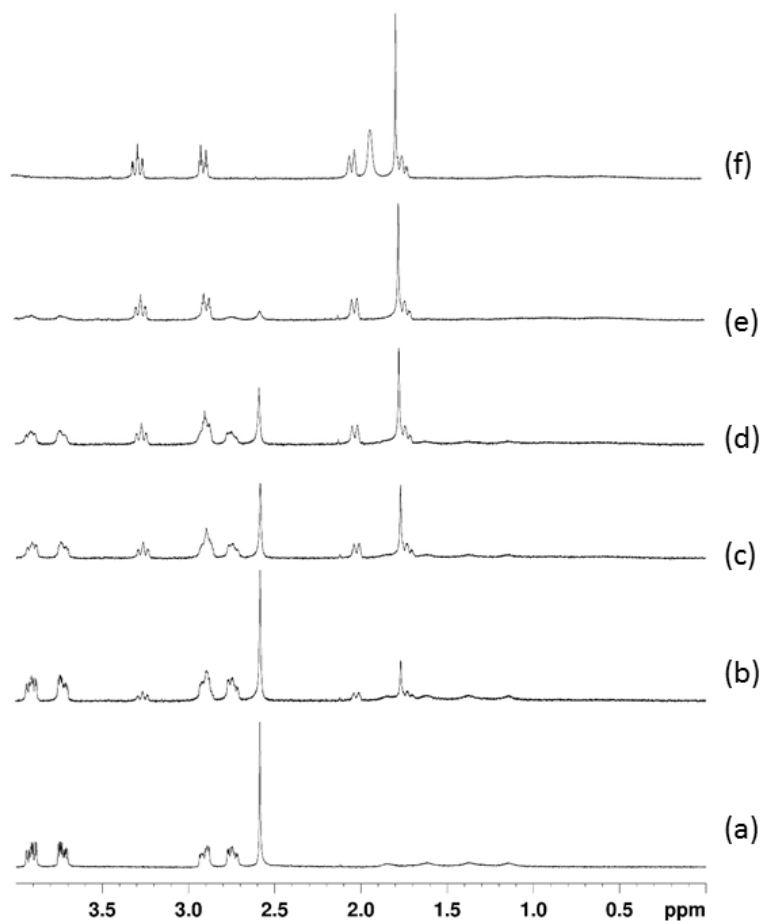

**Figure S6.**  $^1\text{H}$  NMR spectra for N-methylmorpholine borane ( $1.00 \times 10^{-3}$  M) in the presence of (a) 0.00, (b) 0.20, (c) 0.41, (d) 0.62, (e) 0.83, and (f) 1.55 equivalents of CB[7] in  $\text{D}_2\text{O}$ .

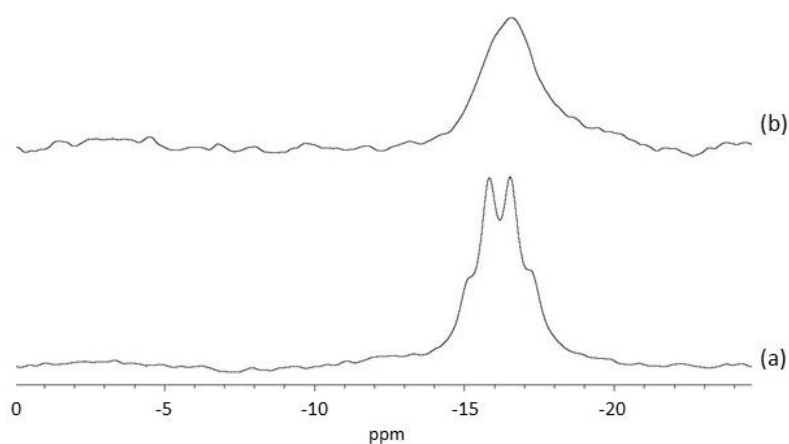

**Figure S7.**  $^{11}\text{B}$  NMR spectra for morpholine borane ( $1.00 \times 10^{-3}$  M) in the presence of (a) 0.0 and (b) 1.4 equivalents of CB[7] in  $\text{D}_2\text{O}$ .
